# Supplementary material for: A neutron diffraction study of hydrogen bonding in isostructural potassium and ammonium lanthanoidates
Source: Royal Society of Chemistry journal article supplement (doi:10.1039/c3ce42031k), 2013-11-11
Supplement: c3ce42031k.pdf [file c3ce42031k.pdf]

# A Neutron Diffraction Study of Hydrogen Bonding in Isostructural Potassium and Ammonium Lanthanoidates

Adrian J. Emerson, Alison J. Edwards, Stuart R. Batten and David R. Turner\*

## Supporting Information

### Overlay Plot of 1Dy and 2Dy (from neutron data)

The diagram below show the overlay of the asymmetric units from the neutron structures of **1Dy** (blue) and **2Dy** (red). The overlay was calculated using Mercury with the fit being calculated on the overlay of the Dy atoms and the oxygen atoms of the four coordinated water molecules.

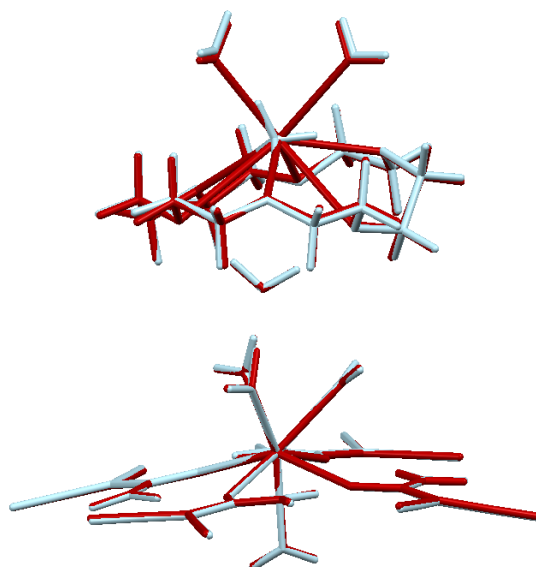

### Geometries of Dy Aqua Ligands (from neutron data)

Angles were calculated using the distance of the Dy atom from the mean H-O-H plane of the aqua ligands ( $x$ ) and the O-Dy bond length ( $y$ ). This equals the angle subtended between the mean-plane of the aqua ligand and the Dy-O bond.

| Water | 1Dy  |      |          | 2Dy  |      |          |
|-------|------|------|----------|------|------|----------|
|       | $x$  | $y$  | $\theta$ | $x$  | $y$  | $\theta$ |
| O5    | 1.56 | 2.45 | 39.6     | 1.59 | 2.45 | 40.4     |
| O6    | 0.62 | 2.43 | 14.9     | 0.55 | 2.43 | 13.1     |
| O7    | 0.56 | 2.42 | 13.4     | 0.65 | 2.42 | 15.5     |
| O8    | 0.12 | 2.36 | 2.8      | 0.01 | 2.36 | 0.2      |

## Nitrile Interactions

The tables below list all of the hydrogen-bonding parameters for the interactions involving nitrile groups in the structures of **1Dy** and **2Dy**, as determined from neutron diffraction data, including the angle subtended at the nitrile nitrogen atom.

|          | D-H / Å   | H...A / Å | D...A / Å | D-H...A / ° | C≡N...H / ° |
|----------|-----------|-----------|-----------|-------------|-------------|
| O5...N2  | 0.966(10) | 1.926(8)  | 2.892(5)  | 178.1(7)    | 159.6       |
| O5...N5  | 0.965(7)  | 1.897(6)  | 2.852(4)  | 169.7(6)    | 146.4       |
| O6...N12 | 0.958(7)  | 1.916(6)  | 2.854(4)  | 165.5(6)    | 163.0       |
| O7...N3  | 0.958(9)  | 1.978(8)  | 2.918(5)  | 166.4(6)    | 166.7       |
| O8...N8  | 0.972(6)  | 1.797(5)  | 2.768(3)  | 176.0(6)    | 155.2       |
| O8...N11 | 0.974(6)  | 1.789(6)  | 2.759(4)  | 173.7(6)    | 150.8       |
| O16...N6 | 0.914(11) | 2.019(9)  | 2.909(7)  | 164.1(10)   | 169.0       |
| O17...N9 | 0.968(9)  | 1.911(7)  | 2.819(4)  | 155.2(6)    | 157.7       |

**Table SXX:** Hydrogen-bond parameters involving nitrile groups in **1Dy** from neutron diffraction data.

|          | D-H / Å   | H...A / Å | D...A / Å | D-H...A / ° | C≡N...H / ° |
|----------|-----------|-----------|-----------|-------------|-------------|
| O5...N2  | 0.953(9)  | 1.933(8)  | 2.886(4)  | 177.5(8)    | 159.4       |
| O5...N5  | 0.964(9)  | 1.896(8)  | 2.849(5)  | 169.6(8)    | 146.3       |
| O6...N12 | 0.965(9)  | 1.906(8)  | 2.848(5)  | 164.8(8)    | 162.1       |
| O7...N3  | 0.981(8)  | 1.958(7)  | 2.915(4)  | 164.4(8)    | 165.9       |
| O8...N8  | 0.977(9)  | 1.800(8)  | 2.776(5)  | 176.6(8)    | 155.9       |
| O8...N11 | 0.963(8)  | 1.795(7)  | 2.754(5)  | 173.3(8)    | 148.7       |
| O16...N6 | 0.926(14) | 2.022(10) | 2.932(7)  | 167.2(11)   | 170.1       |
| O17...N9 | 0.965(10) | 1.922(8)  | 2.828(6)  | 155.4(8)    | 159.2       |

**Table SXX:** Hydrogen-bond parameters involving nitrile groups in **2Dy** from neutron diffraction data.

## Crystal Packing Diagrams

Packing diagrams of **1Dy** and **2Dy** (from neutron data) show the extent of hydrogen bonding in the extended structure.

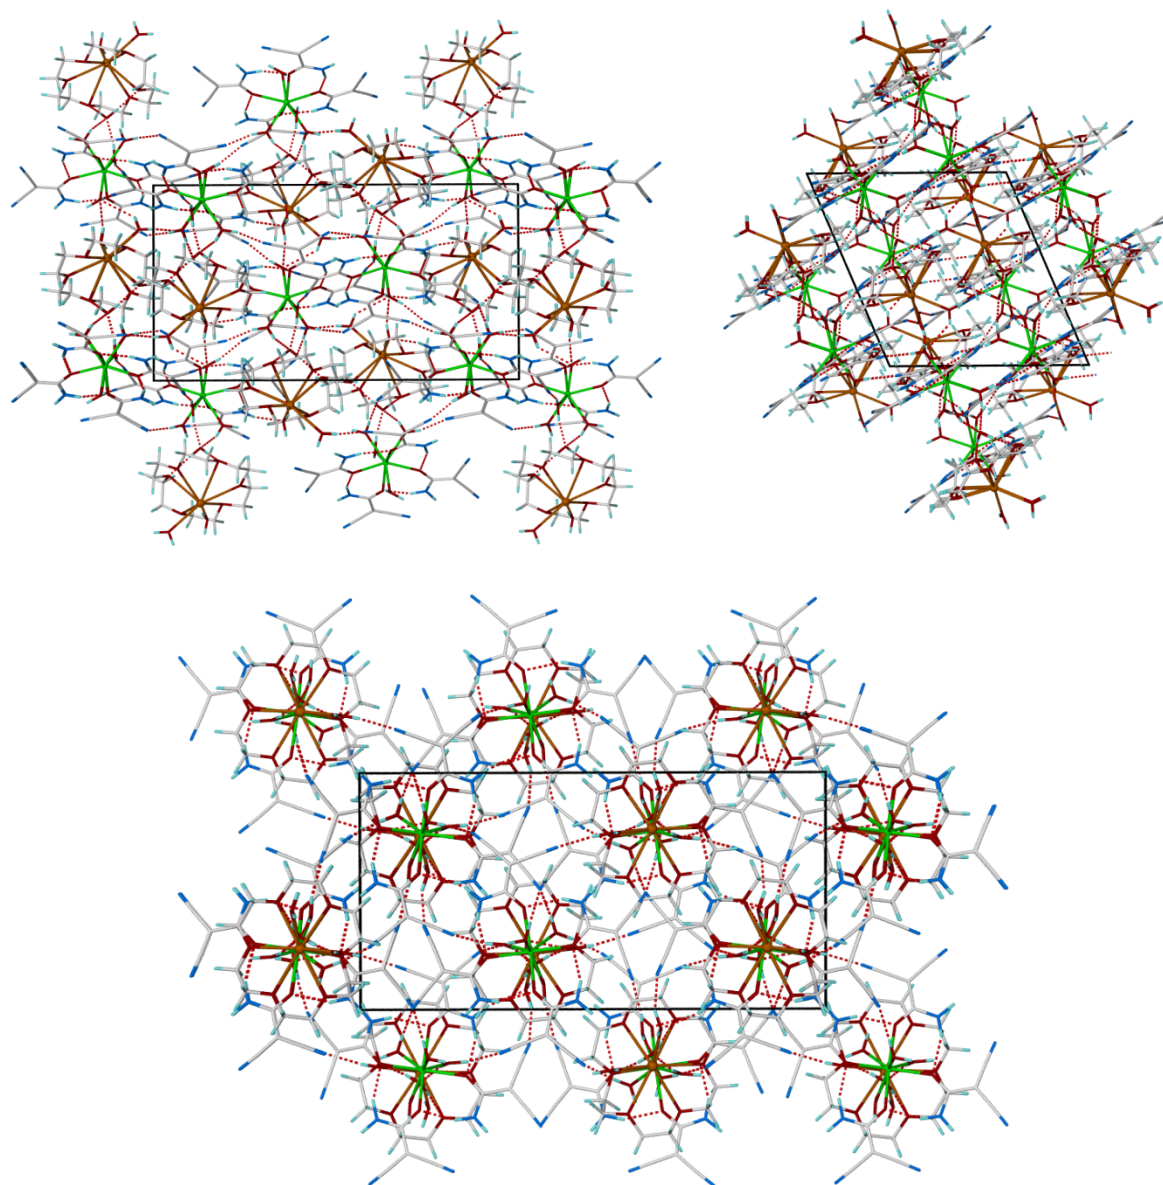

**Figure SXX:** Packing of **2Dy** viewed along the *a*-, *b*- and *c*-axes (clockwise from top left).

### Thermogravimetric Analysis (TGA)

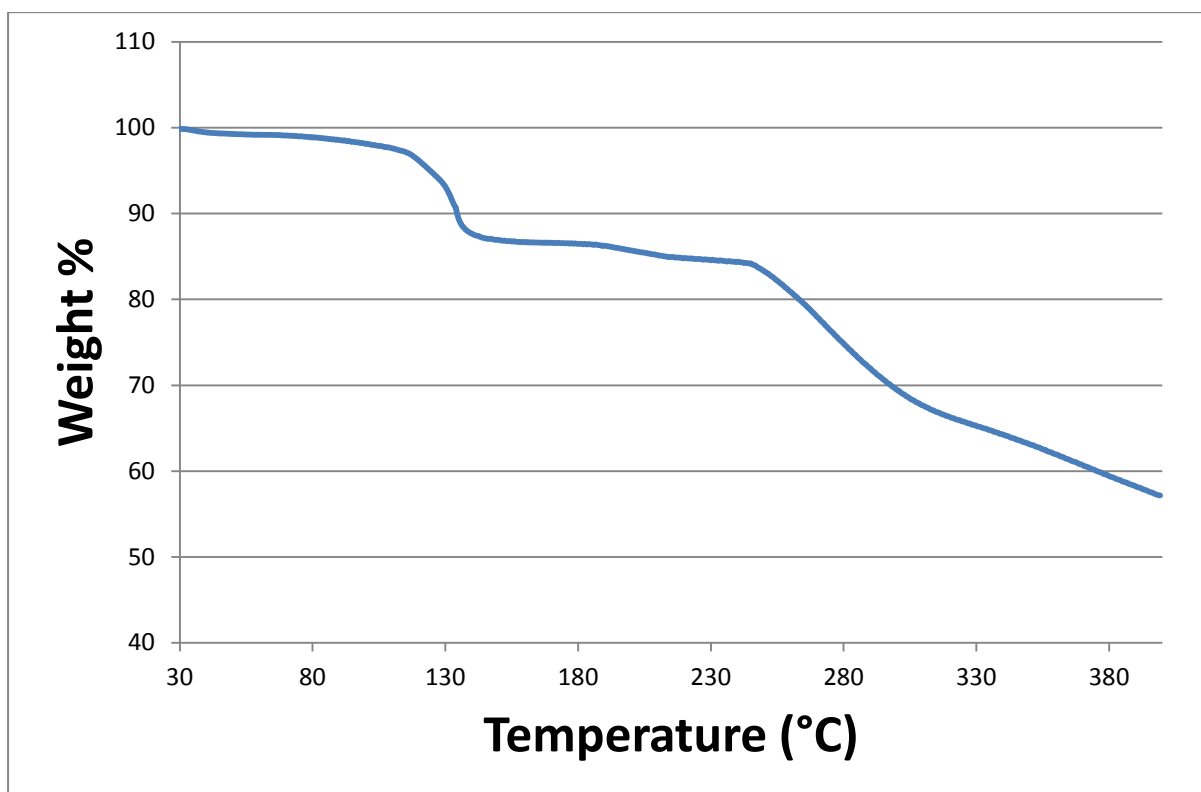

Figure SXX: Thermogravimetric trace for 1Dy.

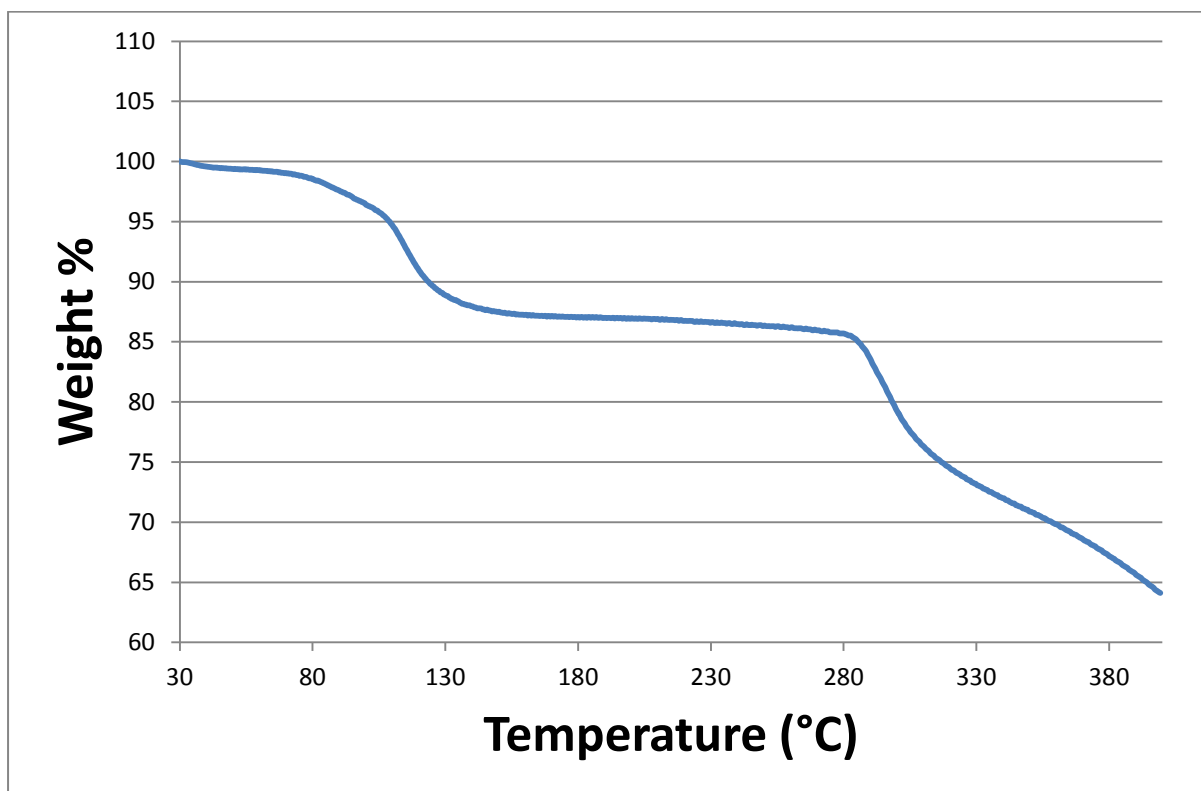

Figure SXX: Thermogravimetric trace for 2Dy.
